# Supplementary material for: On practical problems in precise estimation of 5F-ADB in urine samples
Source: Springer Nature journal article supplement (doi:10.1007/s11419-020-00542-x), 2020-07-31
Supplement: MOESM3 [file 18237420]

**Table S1** Multiple reaction monitoring (MRM) transitions and collision voltages of 5F-ADB and 5F-AMB for gas chromatography – tandem mass spectrometry

| **Compound** | **Retention time**  **[min]** | **Qualitative MRM transition**  **[mass > product mass]** | **Collision voltage**  **[eV]** | **Quantitative MRM transition**  **[mass > product mass]** |
| --- | --- | --- | --- | --- |
| **5F-ADB** | 27.04 | 377>321  377>289  377>233  289>233  321>289 | 7  15  20  12  7 | 321>289 |
| **5F-AMB** | 25.92 | 363>321  363>289  363>233  289>233  321>289 | 7  15  20  12  7 | 321>289 |
